# Supplementary material for: Fighting SARS-CoV-2 with green seaweed Ulva sp. extract: extraction protocol predetermines crude ulvan extract anti-SARS-CoV-2 inhibition properties in in vitro Vero-E6 cells assay
Source: PeerJ. 2021 Nov 15;9:e12398. doi: 10.7717/peerj.12398 (PMC8601053; doi:10.7717/peerj.12398)
Supplement: Supplemental Information 3 [file peerj-09-12398-s003.xlsx]

## Sheet: גיליון1
Table S1. Calibration of Superose 6 Increase 30x1cm 23ml column with globular MW markers
	MW (kDa)	Vol (ml)
1	> 5000kDa	8.35
2	1.34	11.25
3	880	12.6
4	670	12.79
5	440	14.31
6	134	15.87
7	67	17.2
8	32	18.76
9	13.7	21
10	< 5kDa	22.31
