# Supplementary material for: Fighting SARS-CoV-2 with green seaweed Ulva sp. extract: extraction protocol predetermines crude ulvan extract anti-SARS-CoV-2 inhibition properties in in vitro Vero-E6 cells assay
Source: PeerJ. 2021 Nov 15;9:e12398. doi: 10.7717/peerj.12398 (PMC8601053; doi:10.7717/peerj.12398)
Supplement: Supplemental Information 5 — Method for measuring cytotoxic effect of compounds Compound cytotoxicity was assessed in a BSL-2 counter screen as follows: Host cells in media were added in 25 µl aliquots (4000 cells/well) to each well of assay ready plates prepared with test compounds as above. Cells only (100% viability) and cells treated with hyamine at 100 µM final concentration (0% viability) serve as the high and low signal controls, respectively, for cytotoxic effect in the assay. After incubating plates at 37° C/5%CO2 and 90% humidity for 72 h, 30 µl Cell Titer-Glo (Promega) was added to each well. Luminescence was read using a BMG PHERAstar plate reader following incubation at room temperature for 10 min to measure cell viability. [file peerj-09-12398-s005.xlsx]

## Sheet: Cmpds DR Data
Compound ID	Batch	Library ID	Supplier	Supplier ID	Supplier Batch	Plate ID	Well Ref	Assay Conc	Assay Conc Unit	Lum	% Viability	CC50 (mg/mL)	Activity Status	Curve Fit Hill Slope	Curve Fit Norm Chi2	Curve Fit StDev	Number Included Points	Test ID
AB01969157	01	Ramot_15923	TAU	HCl Protocol		TC00752718	B003	5	mg/ml	18545	38.17	3.746	Active	-1.283	4.089	0.381	10	20200525_TOX_RAMOT
AB01969157	01	Ramot_15923	TAU	HCl Protocol		TC00752718	B004	1.6667	mg/ml	35910	74.03							20200525_TOX_RAMOT
AB01969157	01	Ramot_15923	TAU	HCl Protocol		TC00752718	B005	0.5556	mg/ml	42110	86.84							20200525_TOX_RAMOT
AB01969157	01	Ramot_15923	TAU	HCl Protocol		TC00752718	B006	0.1852	mg/ml	46915	96.76							20200525_TOX_RAMOT
AB01969157	01	Ramot_15923	TAU	HCl Protocol		TC00752718	B007	0.0617	mg/ml	45780	94.42							20200525_TOX_RAMOT
AB01969157	01	Ramot_15923	TAU	HCl Protocol		TC00752718	B008	0.0206	mg/ml	46505	95.91							20200525_TOX_RAMOT
AB01969157	01	Ramot_15923	TAU	HCl Protocol		TC00752718	B009	0.0069	mg/ml	48095	99.2							20200525_TOX_RAMOT
AB01969157	01	Ramot_15923	TAU	HCl Protocol		TC00752718	B010	0.0023	mg/ml	45810	94.48							20200525_TOX_RAMOT
AB01969157	01	Ramot_15923	TAU	HCl Protocol		TC00752718	B011	0.0008	mg/ml	47125	97.19							20200525_TOX_RAMOT
AB01969157	01	Ramot_15923	TAU	HCl Protocol		TC00752718	B012	0.0003	mg/ml	47970	98.94							20200525_TOX_RAMOT
AB01969159	01	Ramot_15923	TAU	AOx Protocol		TC00752718	D003	5	mg/ml	24665	50.81	3.581	Active	-0.416	4.301	0.995	10	20200525_TOX_RAMOT
AB01969159	01	Ramot_15923	TAU	AOx Protocol		TC00752718	D004	1.6667	mg/ml	27005	55.64							20200525_TOX_RAMOT
AB01969159	01	Ramot_15923	TAU	AOx Protocol		TC00752718	D005	0.5556	mg/ml	28090	57.88							20200525_TOX_RAMOT
AB01969159	01	Ramot_15923	TAU	AOx Protocol		TC00752718	D006	0.1852	mg/ml	39490	81.43							20200525_TOX_RAMOT
AB01969159	01	Ramot_15923	TAU	AOx Protocol		TC00752718	D007	0.0617	mg/ml	41635	85.86							20200525_TOX_RAMOT
AB01969159	01	Ramot_15923	TAU	AOx Protocol		TC00752718	D008	0.0206	mg/ml	44090	90.93							20200525_TOX_RAMOT
AB01969159	01	Ramot_15923	TAU	AOx Protocol		TC00752718	D009	0.0069	mg/ml	45450	93.73							20200525_TOX_RAMOT
AB01969159	01	Ramot_15923	TAU	AOx Protocol		TC00752718	D010	0.0023	mg/ml	46375	95.64							20200525_TOX_RAMOT
AB01969159	01	Ramot_15923	TAU	AOx Protocol		TC00752718	D011	0.0008	mg/ml	48205	99.42							20200525_TOX_RAMOT
AB01969159	01	Ramot_15923	TAU	AOx Protocol		TC00752718	D012	0.0003	mg/ml	46945	96.82							20200525_TOX_RAMOT

## Sheet: Cmpds DR Graphs
Compound ID	Batch	Library	Supplier	Supplier Id	CC50 (mg/mL)	Graph	Activity Status	Min % Viability	Conc @ Min % Viability	Max % Viability	Conc @ Max % Viability	Number Included Points	Testset Id
AB01969157	01	Ramot_15923	Ramot	HCl Protocol	3.746		Active	38.17	5	99.2	0.0069	10	20200525_TOX_RAMOT
AB01969159	01	Ramot_15923	Ramot	AOx Protocol	3.581		Active	50.81	5	99.42	0.0008	10	20200525_TOX_RAMOT

## Sheet: Ctrl Wells
Object ID	Batch	Plate	Well	Lum	% Viability	Testset ID
Cell Control	01	TC00752718	A001	46540	95.99	20200525_TOX_RAMOT
Cell Control	01	TC00752718	A002	49530	102.16	20200525_TOX_RAMOT
Cell Control	01	TC00752718	B001	45850	94.56	20200525_TOX_RAMOT
Cell Control	01	TC00752718	B002	45915	94.69	20200525_TOX_RAMOT
Cell Control	01	TC00752718	C001	48025	99.05	20200525_TOX_RAMOT
Cell Control	01	TC00752718	C002	48190	99.39	20200525_TOX_RAMOT
Cell Control	01	TC00752718	D001	46745	96.41	20200525_TOX_RAMOT
Cell Control	01	TC00752718	D002	49060	101.19	20200525_TOX_RAMOT
Cell Control	01	TC00752718	E001	50010	103.15	20200525_TOX_RAMOT
Cell Control	01	TC00752718	E002	50860	104.91	20200525_TOX_RAMOT
Cell Control	01	TC00752718	F001	48910	100.88	20200525_TOX_RAMOT
Cell Control	01	TC00752718	F002	49900	102.92	20200525_TOX_RAMOT
Cell Control	01	TC00752718	G001	47660	98.3	20200525_TOX_RAMOT
Cell Control	01	TC00752718	G002	48045	99.09	20200525_TOX_RAMOT
Cell Control	01	TC00752718	H001	48215	99.44	20200525_TOX_RAMOT
Cell Control	01	TC00752718	H002	48915	100.89	20200525_TOX_RAMOT
Cell Control	01	TC00752718	I001	50800	104.78	20200525_TOX_RAMOT
Cell Control	01	TC00752718	I002	47785	98.56	20200525_TOX_RAMOT
Cell Control	01	TC00752718	J001	47710	98.4	20200525_TOX_RAMOT
Cell Control	01	TC00752718	J002	48250	99.52	20200525_TOX_RAMOT
Cell Control	01	TC00752718	K001	46850	96.63	20200525_TOX_RAMOT
Cell Control	01	TC00752718	K002	47125	97.19	20200525_TOX_RAMOT
Cell Control	01	TC00752718	L001	47585	98.14	20200525_TOX_RAMOT
Cell Control	01	TC00752718	L002	50330	103.81	20200525_TOX_RAMOT
Cell Control	01	TC00752718	M001	50490	104.14	20200525_TOX_RAMOT
Cell Control	01	TC00752718	M002	48665	100.37	20200525_TOX_RAMOT
Cell Control	01	TC00752718	N001	47700	98.38	20200525_TOX_RAMOT
Cell Control	01	TC00752718	N002	48540	100.12	20200525_TOX_RAMOT
Cell Control	01	TC00752718	O001	50075	103.29	20200525_TOX_RAMOT
Cell Control	01	TC00752718	O002	50735	104.65	20200525_TOX_RAMOT
Cell Control	01	TC00752718	P001	48190	99.39	20200525_TOX_RAMOT
Cell Control	01	TC00752718	P002	48285	99.59	20200525_TOX_RAMOT
PosCtrl	01	TC00752718	A023	50	-0.02	20200525_TOX_RAMOT
PosCtrl	01	TC00752718	A024	20	-0.08	20200525_TOX_RAMOT
PosCtrl	01	TC00752718	B023	70	0.02	20200525_TOX_RAMOT
PosCtrl	01	TC00752718	B024	50	-0.02	20200525_TOX_RAMOT
PosCtrl	01	TC00752718	C023	75	0.03	20200525_TOX_RAMOT
PosCtrl	01	TC00752718	C024	40	-0.04	20200525_TOX_RAMOT
PosCtrl	01	TC00752718	D023	105	0.09	20200525_TOX_RAMOT
PosCtrl	01	TC00752718	D024	35	-0.05	20200525_TOX_RAMOT
PosCtrl	01	TC00752718	E023	90	0.06	20200525_TOX_RAMOT
PosCtrl	01	TC00752718	E024	55	-0.01	20200525_TOX_RAMOT
PosCtrl	01	TC00752718	F023	75	0.03	20200525_TOX_RAMOT
PosCtrl	01	TC00752718	F024	35	-0.05	20200525_TOX_RAMOT
PosCtrl	01	TC00752718	G023	90	0.06	20200525_TOX_RAMOT
PosCtrl	01	TC00752718	G024	25	-0.07	20200525_TOX_RAMOT
PosCtrl	01	TC00752718	H023	105	0.09	20200525_TOX_RAMOT
PosCtrl	01	TC00752718	H024	60	0	20200525_TOX_RAMOT
PosCtrl	01	TC00752718	I023	85	0.05	20200525_TOX_RAMOT
PosCtrl	01	TC00752718	I024	40	-0.04	20200525_TOX_RAMOT
PosCtrl	01	TC00752718	J023	90	0.06	20200525_TOX_RAMOT
PosCtrl	01	TC00752718	J024	40	-0.04	20200525_TOX_RAMOT
PosCtrl	01	TC00752718	K023	110	0.1	20200525_TOX_RAMOT
PosCtrl	01	TC00752718	K024	40	-0.04	20200525_TOX_RAMOT
PosCtrl	01	TC00752718	L023	70	0.02	20200525_TOX_RAMOT
PosCtrl	01	TC00752718	L024	40	-0.04	20200525_TOX_RAMOT
PosCtrl	01	TC00752718	M023	75	0.03	20200525_TOX_RAMOT
PosCtrl	01	TC00752718	M024	40	-0.04	20200525_TOX_RAMOT
PosCtrl	01	TC00752718	N023	120	0.12	20200525_TOX_RAMOT
PosCtrl	01	TC00752718	N024	35	-0.05	20200525_TOX_RAMOT
PosCtrl	01	TC00752718	O023	65	0.01	20200525_TOX_RAMOT
PosCtrl	01	TC00752718	O024	30	-0.06	20200525_TOX_RAMOT
PosCtrl	01	TC00752718	P023	50	-0.02	20200525_TOX_RAMOT
PosCtrl	01	TC00752718	P024	30	-0.06	20200525_TOX_RAMOT
PosCtrl	01	TC00701968	A023	80	0.04	20200518_TOX_COMM
PosCtrl	01	TC00701968	A024	35	-0.06	20200518_TOX_COMM
PosCtrl	01	TC00701968	B023	90	0.07	20200518_TOX_COMM
PosCtrl	01	TC00701968	B024	40	-0.05	20200518_TOX_COMM
PosCtrl	01	TC00701968	C023	100	0.09	20200518_TOX_COMM
PosCtrl	01	TC00701968	C024	30	-0.07	20200518_TOX_COMM
PosCtrl	01	TC00701968	D023	75	0.03	20200518_TOX_COMM
PosCtrl	01	TC00701968	D024	40	-0.05	20200518_TOX_COMM
PosCtrl	01	TC00701968	E023	75	0.03	20200518_TOX_COMM
PosCtrl	01	TC00701968	E024	25	-0.08	20200518_TOX_COMM
PosCtrl	01	TC00701968	F023	60	0	20200518_TOX_COMM
PosCtrl	01	TC00701968	F024	45	-0.03	20200518_TOX_COMM
PosCtrl	01	TC00701968	G023	105	0.1	20200518_TOX_COMM
PosCtrl	01	TC00701968	G024	60	0	20200518_TOX_COMM
PosCtrl	01	TC00701968	H023	95	0.08	20200518_TOX_COMM
PosCtrl	01	TC00701968	H024	45	-0.03	20200518_TOX_COMM
PosCtrl	01	TC00701968	I023	75	0.03	20200518_TOX_COMM
PosCtrl	01	TC00701968	I024	40	-0.05	20200518_TOX_COMM
PosCtrl	01	TC00701968	J023	65	0.01	20200518_TOX_COMM
PosCtrl	01	TC00701968	J024	35	-0.06	20200518_TOX_COMM
PosCtrl	01	TC00701968	K023	80	0.04	20200518_TOX_COMM
PosCtrl	01	TC00701968	K024	35	-0.06	20200518_TOX_COMM
PosCtrl	01	TC00701968	L023	75	0.03	20200518_TOX_COMM
PosCtrl	01	TC00701968	L024	45	-0.03	20200518_TOX_COMM
PosCtrl	01	TC00701968	M023	85	0.06	20200518_TOX_COMM
PosCtrl	01	TC00701968	M024	40	-0.05	20200518_TOX_COMM
PosCtrl	01	TC00701968	N023	95	0.08	20200518_TOX_COMM
PosCtrl	01	TC00701968	N024	40	-0.05	20200518_TOX_COMM
PosCtrl	01	TC00701968	O023	90	0.07	20200518_TOX_COMM
PosCtrl	01	TC00701968	O024	30	-0.07	20200518_TOX_COMM
PosCtrl	01	TC00701968	P023	75	0.03	20200518_TOX_COMM
PosCtrl	01	TC00701968	P024	25	-0.08	20200518_TOX_COMM
PosCtrl	01	TC00701968G	A023	80	0.04	20200518_TOX_COMM
PosCtrl	01	TC00701968G	A024	35	-0.06	20200518_TOX_COMM
PosCtrl	01	TC00701968G	B023	90	0.07	20200518_TOX_COMM
PosCtrl	01	TC00701968G	B024	40	-0.05	20200518_TOX_COMM
PosCtrl	01	TC00701968G	C023	100	0.09	20200518_TOX_COMM
PosCtrl	01	TC00701968G	C024	30	-0.07	20200518_TOX_COMM
PosCtrl	01	TC00701968G	D023	75	0.03	20200518_TOX_COMM
PosCtrl	01	TC00701968G	D024	40	-0.05	20200518_TOX_COMM
PosCtrl	01	TC00701968G	E023	75	0.03	20200518_TOX_COMM
PosCtrl	01	TC00701968G	E024	25	-0.08	20200518_TOX_COMM
PosCtrl	01	TC00701968G	F023	60	0	20200518_TOX_COMM
PosCtrl	01	TC00701968G	F024	45	-0.03	20200518_TOX_COMM
PosCtrl	01	TC00701968G	G023	105	0.1	20200518_TOX_COMM
PosCtrl	01	TC00701968G	G024	60	0	20200518_TOX_COMM
PosCtrl	01	TC00701968G	H023	95	0.08	20200518_TOX_COMM
PosCtrl	01	TC00701968G	H024	45	-0.03	20200518_TOX_COMM
PosCtrl	01	TC00701968G	I023	75	0.03	20200518_TOX_COMM
PosCtrl	01	TC00701968G	I024	40	-0.05	20200518_TOX_COMM
PosCtrl	01	TC00701968G	J023	65	0.01	20200518_TOX_COMM
PosCtrl	01	TC00701968G	J024	35	-0.06	20200518_TOX_COMM
PosCtrl	01	TC00701968G	K023	80	0.04	20200518_TOX_COMM
PosCtrl	01	TC00701968G	K024	35	-0.06	20200518_TOX_COMM
PosCtrl	01	TC00701968G	L023	75	0.03	20200518_TOX_COMM
PosCtrl	01	TC00701968G	L024	45	-0.03	20200518_TOX_COMM
PosCtrl	01	TC00701968G	M023	85	0.06	20200518_TOX_COMM
PosCtrl	01	TC00701968G	M024	40	-0.05	20200518_TOX_COMM
PosCtrl	01	TC00701968G	N023	95	0.08	20200518_TOX_COMM
PosCtrl	01	TC00701968G	N024	40	-0.05	20200518_TOX_COMM
PosCtrl	01	TC00701968G	O023	90	0.07	20200518_TOX_COMM
PosCtrl	01	TC00701968G	O024	30	-0.07	20200518_TOX_COMM
PosCtrl	01	TC00701968G	P023	75	0.03	20200518_TOX_COMM
PosCtrl	01	TC00701968G	P024	25	-0.08	20200518_TOX_COMM

## Sheet: Batch Ctrl
Plate	Z Analysis	Avg Cell Ctrl	StDev Cell Ctrl	CV Cell Ctrl	Avg Pos Ctrl	StDev Pos Ctrl	CV Pos Ctrl	Testset ID
TC00752718	0.91	48483.9	1403	2.89	60.625	28	45.5	20200525_TOX_RAMOT

## Sheet: Notes
	Abase testset ID:	20200525_TOX_RAMOT
